# Supplementary material
Source: publisher figshare collection journal article supplement (https://acs.figshare.com/ndownloader/files/4655914)
Supplement: Supplementary file 1 [file 4655914]

**Supporting Information for:**

Effects of Pharmaceutically Active Compounds on Activated Sludge Microorganisms

Shuyi Wang, Ryan Holzem<sup>†</sup>, Claudia.K. Gunsch<sup>\*</sup>

Department of Civil and Environmental Engineering, Duke University, Box 90287,  
Durham, NC 27708, USA

Number of pages: 5

Number of tables: 1

Number of figures: 0

<sup>\*</sup>Correspondence author phone: 919-660-5208; fax: 919-660-5219; e-mail:  
[ckgunsch@duke.edu](mailto:ckgunsch@duke.edu)

<sup>†</sup> Present address: Department of Environmental Engineering, University of Wisconsin,  
1415 Engineering Dr, Madison, WI 53706

**Relationship Between OD<sub>600</sub> and Cell Mass.** Cell mass measurements were derived from OD<sub>600</sub> measurements using the standard curve shown in Figure S1. The standard curve was prepared by vacuum filtering 10 mL cell cultures with known OD<sub>600</sub> values through dry Whatman filter membranes (0.2 µM). Membranes were placed in aluminum planchettes, dried at 105 °C for 4 hours, cooled to room temperature in a desiccator and weighed on a four-place balance. All measurements were performed in triplicates.

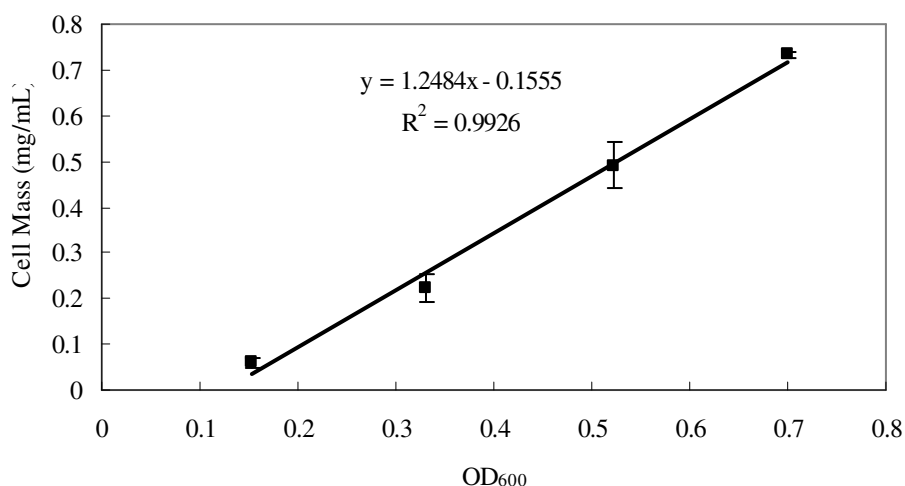

Figure S1. Standard curve of OD<sub>600</sub> and cell mass.

**Specific Oxygen Uptake Rate (SOUR) Measurements.** SOUR measurements were obtained using standard methods (1). Briefly, 10 mL of inoculum sludge (i.e., Day 0) and 10 µM PhACs were added in 300-mL bottles filled with basal medium. The DO levels were measured using a pre-inserted DO probe (YSI model 50B, Yellow Springs, Ohio) over a 20 min period. VSS was measured using standard methods (1). SOUR measurements were performed at a final PhAC concentration of 10 µM in 0.2% (v/v)

ethanol. Triplicate tests were performed for each PhAC.

**DNA Extraction.** One hundred  $\mu\text{L}$  biomass samples were obtained by centrifuging 1 min at  $16,300\times g$  RCF at room temperature using a Spectrafuge 24D microcentrifuge (Eppendorf, Inc., Woodbridge, New Jersey). If DNA extraction was not performed immediately, the cell pellets were stored at  $-80\text{ }^{\circ}\text{C}$  in a Revco Ultima Ultra-Cold Freezer (Thermo Electron Corporation, Marietta, Ohio). DNA was extracted using Mo Bio Ultra Clean<sup>TM</sup> microbial DNA kits (Carlsbad, California). The extraction was performed following the manufacturer's instructions without any modifications. The purified DNA was eluted in sterile water and stored at  $-20^{\circ}\text{C}$  (GE<sup>®</sup> Upright Freezer, Louisville, Kentucky) for PCR amplification. DNA quality was assessed by measuring the  $A_{260}/A_{280}$  ratio using a ND-1000 Spectrophotometer (Nanodrop<sup>®</sup>, Wilmington, Delaware). Only samples with ratios between 1.8 and 1.9 were used (2).

**Polymerase Chain Reaction (PCR).** The first PCR product was amplified using the bacterial forward primer 8F and the universal reverse primer 1492R (3). The final PCR amplicon was obtained using the I-341-fGC and I-533r primers (4). A summary of the primers sequences is shown in Table 2. All PCR amplifications were performed using a GeneAmp<sup>®</sup> PCR System 9700 (Applied Biosystems, Foster City, CA). All reagents were obtained from the Eppendorf MasterTaq<sup>®</sup> kit (Hamburg, Germany) and used following the manufacturer's instructions. The program for the first PCR amplification consisted of a 30-sec denaturation step at  $94^{\circ}\text{C}$ , followed by a 30-sec

annealing step at 52°C and a 30-sec extension step at 72°C (30 cycles). Touch-down PCR was used for the second PCR amplification. The first two cycles consisted of a 30-sec denaturation step at 94°C, a 30-sec annealing step at 52°C and a 30-sec extension step at 72°C. The next 30 cycles consisted of a 30-sec denaturation step at 94°C, a 30-sec annealing step at 47°C and a 30-sec extension step at 72°C.

Table S1. Primer sequences for DGGE analysis. <sup>a</sup> Numbers correspond to the nucleotide positions in *Escherichia.coli*; F or f, forward primer; R or r, reverse primer. <sup>b</sup> I, inosine.

| Primer <sup>a</sup> | Sequence (5'-3') <sup>b</sup>                         |
|---------------------|-------------------------------------------------------|
| 8F                  | AGAGTTTGATCCTGGCTCAG                                  |
| 1492R               | GGTTACCTTGTTACGACTT                                   |
| I-341-fGC           | CGCCCGCCGCGCGCGGGCGGGGCGGGGGCACGGGGGGCCTACGGGIGGCIGCA |
| I-533r              | TIACCGIIICTICTGGCAC                                   |

**Denaturing Gradient Gel Electrophoresis (DGGE).** All PCR amplifications were loaded on an 8% (w/v) polyacrylamide gel with a denaturing gradient ranging from 20 to 55% urea-formamide (100% denaturing solution corresponded to 40% (v/v) deionized formamide and 7 M urea). The gel was run at 57°C under a voltage of 50 V for 18 h and then stained with 1X SYBR Gold (Molecular Probes, Eugene, OR). Sequencing was performed on excised bands using the I-533r primer. DNA sequence analysis was performed using the BLAST server of the National Centre for Biotechnology Information (<http://www.ncbi.nlm.nih.gov>).

References:

- (1) Eaton A.D.; Clesceri L.S.; Rice E.W.; A.E., G., Standard methods for the examination of water and wastewater (21st Edition). **2005**, 2:79-80.
- (2) Glasel, J. A., Validity of Nucleic Acid Purities Monitored by A260/A280 Absorbance Ratios. *Biotechniques* **1995**, 18, (62-63).
- (3) Weisburg, W. G.; Barns, S. M.; Pelletier, D. A.; Lane, D. J., 16s Ribosomal DNA Amplification for Phylogenetic Study. *Journal of Bacteriology* **1991**, 173, (2), 697-703.
- (4) Watanabe, K.; Kodama, Y.; Harayama, S., Design and evaluation of PCR primers to amplify bacterial 16S ribosomal DNA fragments used for community fingerprinting. *Journal of Microbiological Methods* **2001**, 44, (3), 253-262.
